# Supplementary material
Source: PubMed Central journal article supplement (PMC6054465)
Supplement: NIHMS904353-supplement-Supp_info.pdf [file NIHMS904353-supplement-Supp_info.pdf]

## Supplementary Information

A toxic imbalance of Hsp70s in *Saccharomyces cerevisiae* is caused by competition for cofactors  
Kathryn M. Keefer and Heather L. True

**Table S1. Plasmids used in this study.**

| Plasmid | Description    | Use                                            | Reference                    |
|---------|----------------|------------------------------------------------|------------------------------|
| --      | pRS314         | Empty vector control, TRP1-marked              | (Sikorski and Hieter, 1989)  |
| --      | pRS315         | Empty vector control, LEU2-marked              | (Sikorski and Hieter, 1989)  |
| --      | pRS316         | Empty vector control, URA3-marked              | (Sikorski and Hieter, 1989)  |
| 6391    | p415GPD-SSA1   | Overexpress Ssa1 from GPD promotor             | (Keefer and True, 2016)      |
| 6750    | p415GPD-SSB1   | Overexpress Ssb1 from GPD promotor             | (Keefer and True, 2016)      |
| 5162    | p314CUP1-SUP35 | Express Sup35 from a copper-inducible promotor | (Keefer and True, 2016)      |
| EC1219  | p316-SSB1      | Express WT Ssb1                                | (James <i>et al.</i> , 1997) |
| EC1327  | p316-SSA1      | Express WT Ssa1                                | (James <i>et al.</i> , 1997) |
| EC1659  | p316-ABB       | Express Ssa1/Ssb1 chimera                      | (James <i>et al.</i> , 1997) |
| EC1662  | p316-BAA       | Express Ssa1/Ssb1 chimera                      | (James <i>et al.</i> , 1997) |
| EC1695  | p316-AAB       | Express Ssa1/Ssb1 chimera                      | (James <i>et al.</i> , 1997) |
| EC1696  | p316-ABA       | Express Ssa1/Ssb1 chimera                      | (James <i>et al.</i> , 1997) |
| EC1697  | p316-BAB       | Express Ssa1/Ssb1 chimera                      | (James <i>et al.</i> , 1997) |
| EC1698  | p316-BBA       | Express Ssa1/Ssb1 chimera                      | (James <i>et al.</i> , 1997) |
| 5708    | p316-SSE1      | Overexpress Sse1 as second copy                | This study                   |
| 5435    | p316-YDJ1      | Overexpress Ydj1 as second copy                | This study                   |
| 6761    | p416GPD-Ssb1   | Overexpress Ssb1 from Ura-marked plasmid       | This study                   |
| 6532    | p415TEF-Sse1   | Overexpress Sse1 from Leu-marked plasmid       | This study                   |

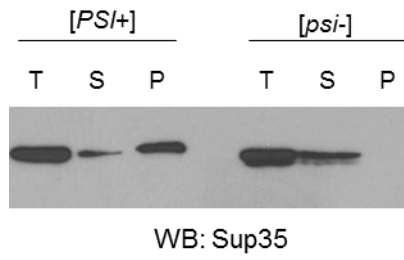

**Figure S1.**

A [psi-] control, performed concurrently with the blot in Figure 1F, demonstrates that the solubility assay can differentiate between [PSI+] and [psi-] strains of yeast.
